# Supplementary material for: Genetic Characterization in Familial Rotator Cuff Tear: An Exome Sequencing Study
Source: MDPI journal article supplement (doi:10.3390/biology11111565), 2022-10-25
Supplement: s1 [file s1]

**Table S1** - Potentially damaging variants present in affected patients, but not in the healthy ones.

| Gene    | Chr | Position  | DNA & AA change                            | gnomAD<br>MAF (%) | <i>In silico</i><br>prediction tools | CADD<br>score |
|---------|-----|-----------|--------------------------------------------|-------------------|--------------------------------------|---------------|
| LINGO4  | 1   | 151774279 | NM_001004432:c.902G>A:p.(Arg301Gln)        | 0,026             | 10/18 damaging                       | 28,5          |
| RNF149  | 2   | 101911601 | NM_173647:c.503G>T:p.(Gly168Val)           | 0,001             | 9/12 damaging                        | 29,8          |
| C2orf40 | 2   | 106690387 | NM_032411:exon3:c.C173T:p.A58V             | 0,0004            | 9/11 damaging                        | 24,6          |
| DBI     | 2   | 120125869 | NM_001079862:c.115G>A:p.(Asp39Asn)         | 0,466             | .                                    | 24,4          |
| COL23A1 | 5   | 177673296 | NM_173465:c.C1372C>T:p.(Pro458Ser)         | 0,062             | 8/12 damaging                        | 23,9          |
| JARID2  | 6   | 15496817  | NM_004973:c.1361A>C:p.(Gln454Pro)          | .                 | 8/12 damaging                        | 22,7          |
| MDC1    | 6   | 30681083  | NM_014641:c.618_636del:p.(Gly207ProfsTer3) | 0,21              | 1/1 damaging                         | 24            |
| UPK2    | 11  | 118827665 | NM_006760:c.149C>A:p.(Pro50His)            | 0,049             | 12/20 damaging                       | 26,3          |
| KIFC3   | 16  | 57803855  | NM_005550:c.952G>A:p.(Glu318Lys)           | 0,024             | 10/12 damaging                       | 27,7          |
| ABCA9   | 17  | 66981048  | NM_080283:c.4357C>A:p.(Pro1453Thr)         | 0,41              | 8/11 damaging                        | 24            |
| GIPR    | 19  | 46181024  | NM_000164:c.911T>G:p.(Leu304Arg)           | 0,016             | 8/12 damaging                        | 28,2          |
| EHD2    | 19  | 48239657  | NM_014601:c.947A>G:p.(Lys316Arg)           | 0,011             | 14/19 damaging                       | 22,8          |
| EMILIN3 | 20  | 39990792  | NM_052846:c.1417C>T:p.(Arg473Cys)          | 0,006             | 11/19 damaging                       | 26,3          |
| PREX1   | 20  | 47307634  | NM_020820:c.1037C>T:p.(Ala346Val)          | 0,001             | 10/19 damaging                       | 28,1          |
| GATD3   | 21  | 45560145  | NM_004649:c.442G>A:p.(Val148Met)           | 0,95              | 6/9 damaging                         | 23,5          |
| HDAC10  | 22  | 50686379  | NM_032019:c.1277C>T:p.(Pro426Leu)          | .                 | .                                    | 24            |

Chr = Chromosome

AA change = Aminoacid change

GnomAD MAF = Minor allele frequency of the identified variant in the population reported by the GnomAD database

CADD score = deleteriousness score of single nucleotide variants and insertion/deletion variants in the human genome
